# Supplementary material for: An amino-substituted 2-(2′-hydroxyphenyl)benzimidazole for the fluorescent detection of phosgene based on an ESIPT mechanism
Source: Royal Society of Chemistry journal article supplement (doi:10.1039/d1ra00811k), 2021-01-01
Supplement: d1ra00811k1.pdf [file d1ra00811k1.pdf]

## Supplementary Information

### An amino-substituted 2-(2'-hydroxyphenyl)benzimidazole for the fluorescent detection of phosgene based on ESIPT mechanism

Zi-Jie Li,<sup>a</sup> Wen-Jie Zhang,<sup>a</sup> Wen-Zhu Bi,<sup>\*a</sup> Qiu-Juan Ma,<sup>\*a</sup> Su-Xiang Feng,<sup>\*abc</sup> Xiao-Lan Chen,<sup>d</sup> and Ling-Bo Qu<sup>d</sup>

<sup>a</sup> School of Pharmacy, Henan University of Chinese Medicine, Zhengzhou, 450046, China.

<sup>b</sup> Collaborative Innovation Center for Respiratory Disease Diagnosis and Treatment & Chinese Medicine Development of Henan Province, Zhengzhou, 450046, China

<sup>c</sup> Zhengzhou Key Laboratory of Chinese Medicine Quality Control and Evaluation, Zhengzhou, 450046, China

<sup>d</sup> College of Chemistry, Zhengzhou University, Zhengzhou, 450052, China.

Corresponding E-mail: [biwenzhu2018@hactcm.edu.cn](mailto:biwenzhu2018@hactcm.edu.cn)

## Contents

|                                                                                  |     |
|----------------------------------------------------------------------------------|-----|
| 1. Evaluation of HBI as the fluorescent probe for the detection of phosgene..... | S2  |
| 2. Measurement of the fluorescence quantum yields.....                           | S3  |
| 3. UV-Vis spectra of P1 upon addition of phosgene.....                           | S4  |
| 4. Measurement of the LoD for P1.....                                            | S4  |
| 5. The selectivity of P1 for the detection of phosgene.....                      | S5  |
| 6. Fluorescence spectra of P1 in the presence of interfering compounds.....      | S6  |
| 7. Table S1 Determination of phosgene in the presence of interfering compounds.. | S6  |
| 8. HPLC-MS chromatogram and spectrum of the reaction mixture.....                | S6  |
| 9. <sup>1</sup> H NMR, <sup>13</sup> C NMR and HRMS copies of P1 and P1-CO.....  | S7  |
| 10. Table S2 Comparison of recently reported probes for phosgene detection.....  | S11 |

### 1. Evaluation of HBI as the fluorescence probe for the detection of phosgene

HBI (2-(2'-hydroxyphenyl)benzimidazole) was synthesized according to literature methods with minor modifications.<sup>1</sup> The method for the evaluation of HBI as the fluorescent

probe for the detection of phosgene was same as that of **P1**.

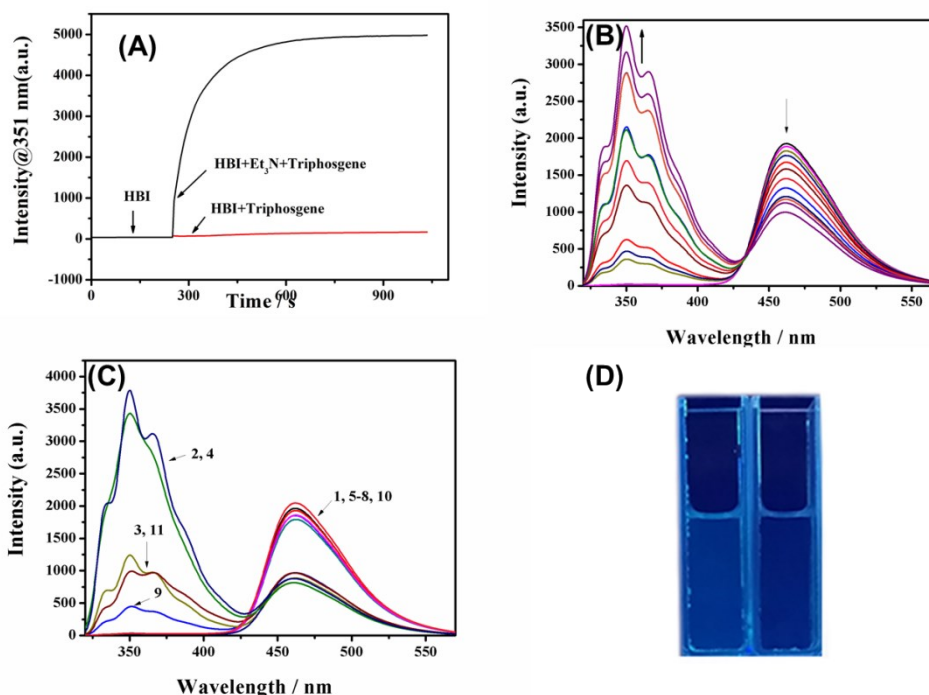

**Figure S1** (A) Time-dependent fluorescence intensity at 351 nm of HBI (10  $\mu$ M) treated with triphosgene (10  $\mu$ M) in the presence (black line) or absence (red line) of TEA (20  $\mu$ L, 0.1 vol%),  $\lambda_{ex}$  = 309 nm,  $\lambda_{em}$  = 351 nm, slit width = 5/5 nm. (B) Fluorescence spectra of 10  $\mu$ M HBI solutions containing TEA (20  $\mu$ L, 0.1 vol%) upon addition of triphosgene (0-5  $\mu$ M),  $\lambda_{ex}$  = 309 nm, slit width = 5/5 nm. (C) Fluorescence spectra of HBI solutions before and after addition of phosgene or various analytes (0.2 mM) for 10 min: (1) blank, (2) triphosgene (5  $\mu$ M)/TEA (20  $\mu$ L, 0.1 vol%), (3) (COCl)<sub>2</sub>, (4) CH<sub>3</sub>COCl, (5) SOCl<sub>2</sub>, (6) TsCl, (7) DCP, (8) HOAc, (9) POCl<sub>3</sub>, (10) SO<sub>2</sub>Cl<sub>2</sub>, (11) triphosgene.  $\lambda_{ex}$  = 309 nm. (D) Images of HBI solution before (left) and after (right) addition of phosgene under 365 nm UV-light.

#### Reference

1. K. Akutsu, S. Mori, K. Shinmei, H. Iwase, Y. Nakano and Y. Fujii, *Talanta*, 2016, **146**, 575.

## 2. Measurement of the fluorescence quantum yields

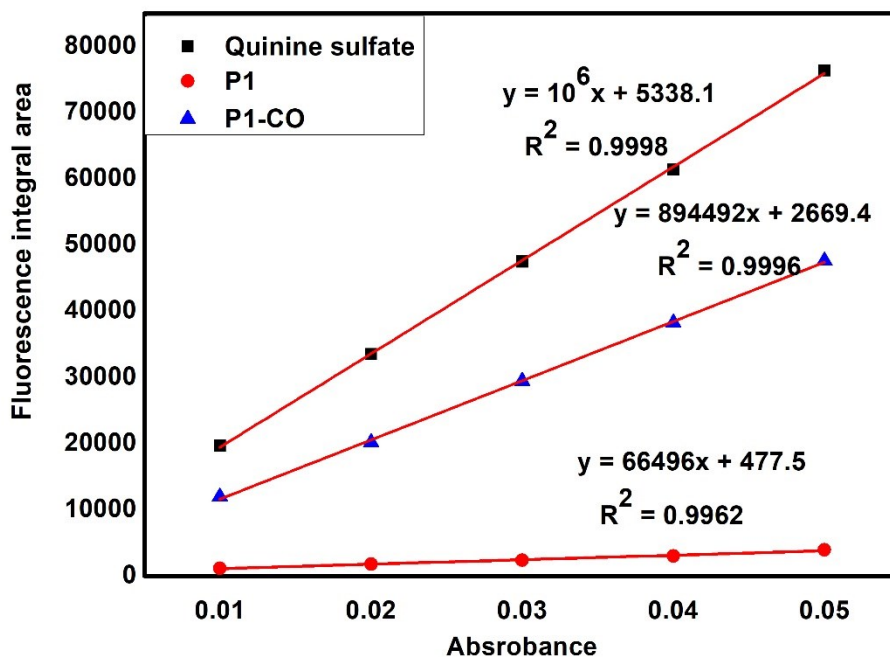

**Figure S2** Measurement of the fluorescence quantum yields ( $\Phi_f$ ) of **P1** and **P1-CO**. **P1** and **P1-CO** were determined in  $\text{CH}_2\text{Cl}_2$  with solvent refractive index correction. Quinine sulfate in 1.0 M  $\text{H}_2\text{SO}_4$  was used as the reference ( $\Phi_f = 54\%$ ) at an excitation wavelength of 346 nm. The fluorescence quantum yield was calculated by the following equation:  $\Phi_x = \Phi_s (F_x/F_s)(A_s/A_x)(n_x/n_s)^2$ . Where x and s indicate the determined and reference, respectively, F is the area of the fluorescence peak, A is the optical density at the excitation wavelength, and n is the refractive index of the solvent.

### 3. UV-Vis spectra of P1 upon addition of phosgene

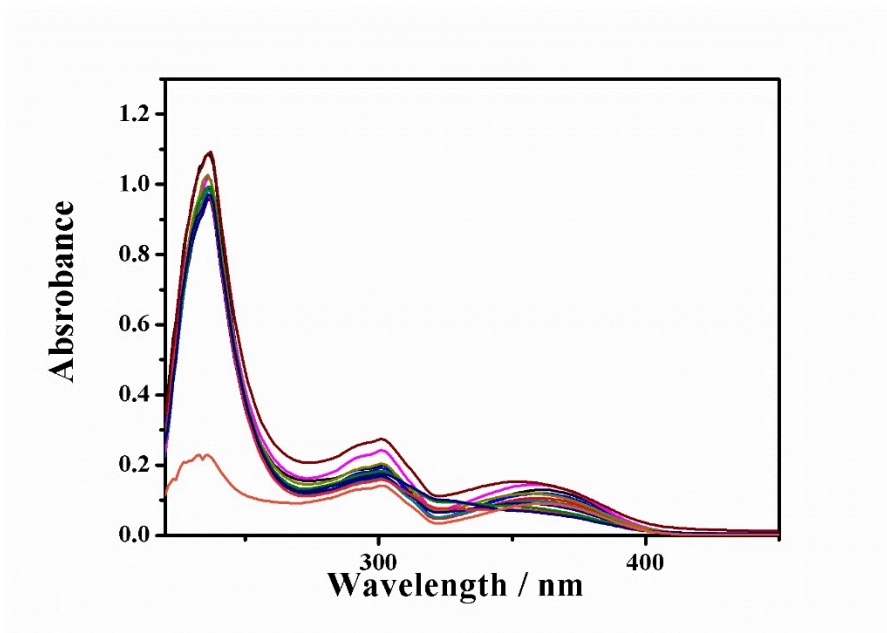

**Figure S3.** UV-Vis spectra of 10  $\mu\text{M}$  **P1** solutions containing TEA (20  $\mu\text{L}$ , 0.1 vol%) upon addition of triphosgene (0-6  $\mu\text{M}$ ).

#### 4. Measurement of the LoD for P1

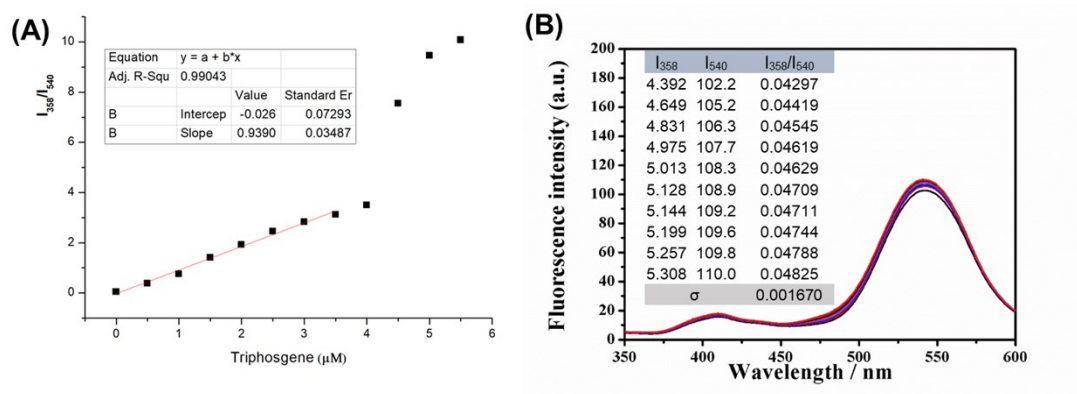

**Figure S4** Measurement of the LoD for **P1** to triphosgene. (A) The ratio of the emission intensities at 358 and 540 nm vs. the triphosgene concentration. (B) Ten times of the blank experiment to evaluate the standard deviation  $\sigma$ . The triphosgene detection limit was determined to be 5.3 nM ( $\text{LoD} = 3\sigma/k$ , where  $\sigma$  is the standard deviation of the blank experiment, and  $k$  is the slope of the relationship between the emission-intensity ratio and the phosgene concentration).

#### 5. The selectivity of P1 for the detection of phosgene.

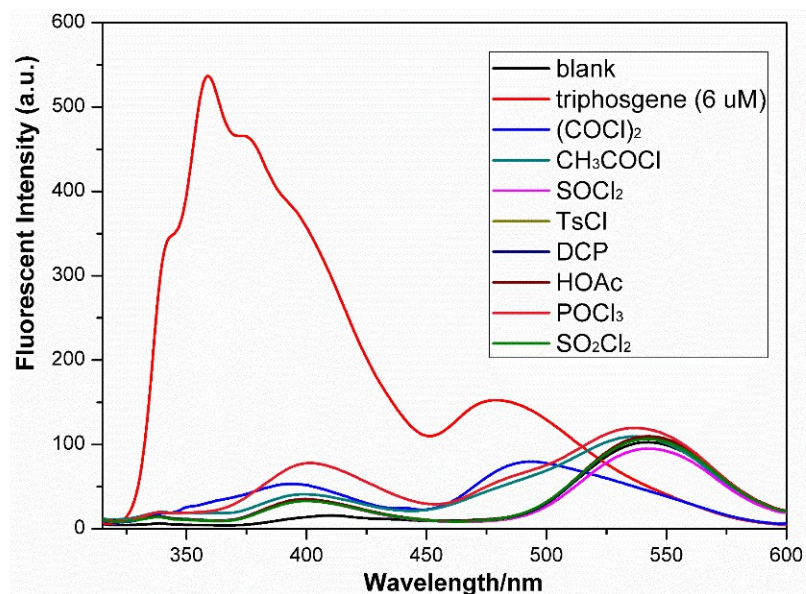

**Figure S5.** Fluorescence spectra of **P1** (10  $\mu\text{M}$ ) containing TEA (20  $\mu\text{L}$ , 0.1 vol%) in 2 mL  $\text{CH}_2\text{Cl}_2$  upon addition of phosgene or various analytes (50  $\mu\text{M}$ ) for 10 min.  $\lambda_{\text{ex}}$  = 305 nm.

## 6. Fluorescence spectra of **P1** in the presence of interfering compounds

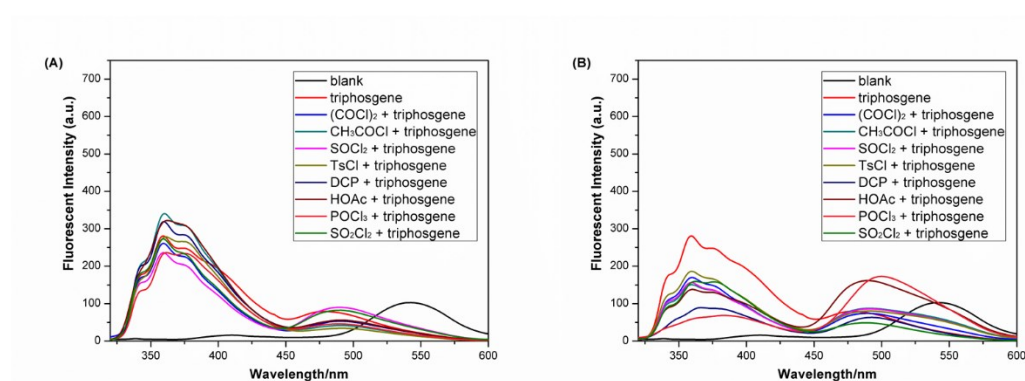

**Figure S6** Fluorescence spectra of 10  $\mu\text{M}$  **P1** containing TEA (20  $\mu\text{L}$ , 0.1 vol%) and interferents (A, 5.0  $\mu\text{M}$ ; B, 10  $\mu\text{M}$ ) in the presence of 3.0  $\mu\text{M}$  of triphosgene in 2 mL  $\text{CH}_2\text{Cl}_2$ .  $\lambda_{\text{ex}}$  = 305 nm.

## 7. Table S1 Determination of phosgene in the presence of interfering compounds

| Interfering compounds (5.0 $\mu$ M) | Phosgene added ( $\mu$ M) | Phosgene found ( $\mu$ M) | Recovery (%) | Interfering compounds (10 $\mu$ M) | Phosgene added ( $\mu$ M) | Phosgene found ( $\mu$ M) | Recovery (%) |
|-------------------------------------|---------------------------|---------------------------|--------------|------------------------------------|---------------------------|---------------------------|--------------|
| (COCl) <sub>2</sub>                 | 9.0                       | 8.7                       | 96.7         | (COCl) <sub>2</sub>                | 9.0                       | 5.15                      | 57.1         |
| CH <sub>3</sub> COCl                | 9.0                       | 9.8                       | 108.9        | CH <sub>3</sub> COCl               | 9.0                       | 4.7                       | 52.0         |
| SOCl <sub>2</sub>                   | 9.0                       | 8.1                       | 90.0         | SOCl <sub>2</sub>                  | 9.0                       | 4.55                      | 50.8         |
| TsCl                                | 9.0                       | 8.15                      | 90.5         | TsCl                               | 9.0                       | 4.75                      | 52.8         |
| DCP                                 | 9.0                       | 9.45                      | 105.2        | DCP                                | 9.0                       | 5.6                       | 62.4         |
| HOAc                                | 9.0                       | 9.35                      | 104.1        | HOAc                               | 9.0                       | 2.45                      | 27.5         |
| POCl <sub>3</sub>                   | 9.0                       | 7.9                       | 87.8         | POCl <sub>3</sub>                  | 9.0                       | 4.2                       | 46.6         |
| SO <sub>2</sub> Cl <sub>2</sub>     | 9.0                       | 8.15                      | 90.7         | SO <sub>2</sub> Cl <sub>2</sub>    | 9.0                       | 1.85                      | 20.6         |

## 8. HPLC-MS chromatogram and spectrum of the reaction mixture

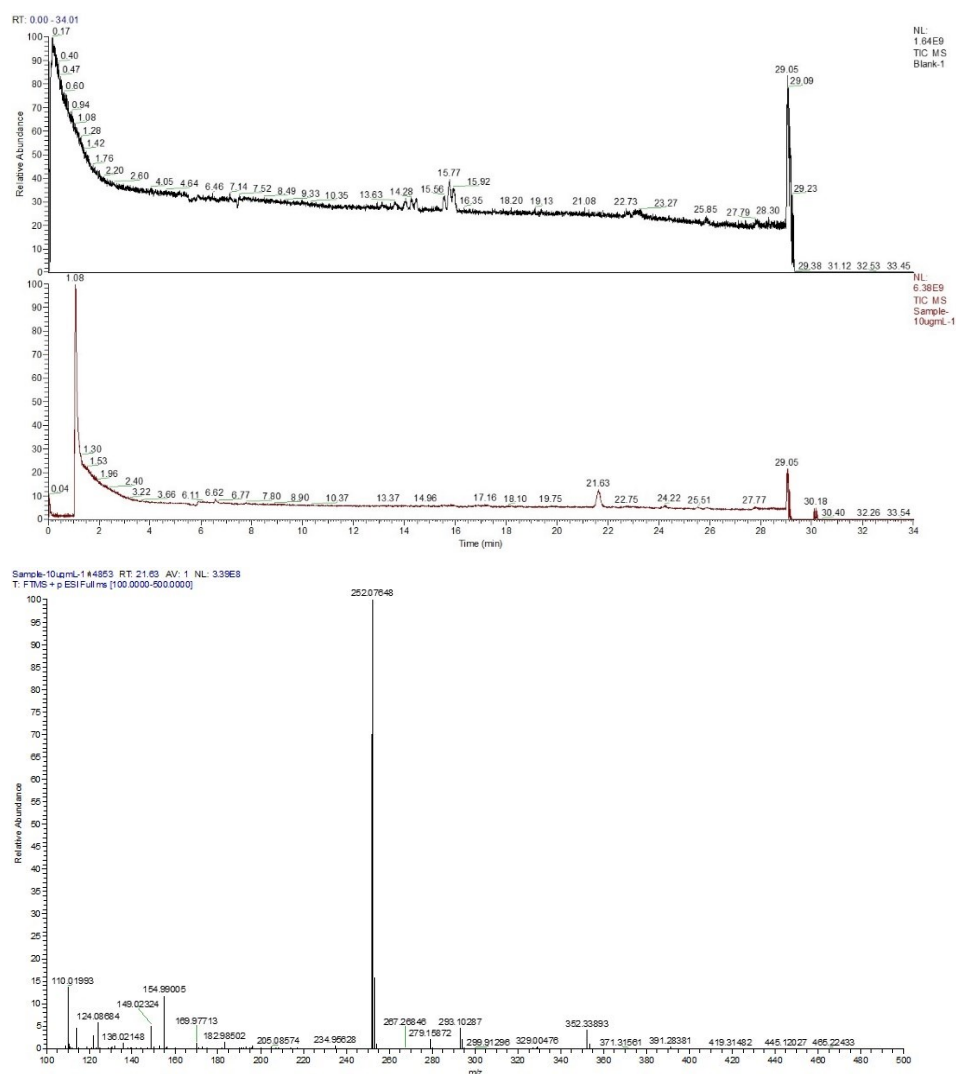

**Figure S7** HPLC chromatogram (up) of the reaction mixture and MS spectrum (down) of the peak at 21.63 min. Chromatographic conditions: chromatographic column: Accucore™ C18 (150 × 4.6 mm, 2.6  $\mu$ m); mobile phase: 0.1% formic acid (A), 0.1% formic acid water

acetonitrile (B); gradient elution: 0 ~ 1 min, 95% A; 1~25 min, 95%~0% A; 25~29 min, 0% A; 29~29.1 min, 0%~95% A, 29.1~34 min, 95% A; flow rate: 0.2 mL/min; column temperature: 30 °C. Mass spectrometry conditions: ion source: heated electrospray ionization source (H-ESI); auxiliary gas pressure: 1.0 Mpa; capillary temperature: 300 °C, auxiliary heating temperature: 275 °C.

### 9. <sup>1</sup>H NMR, <sup>13</sup>C NMR and HRMS copies of P1 and P1-CO

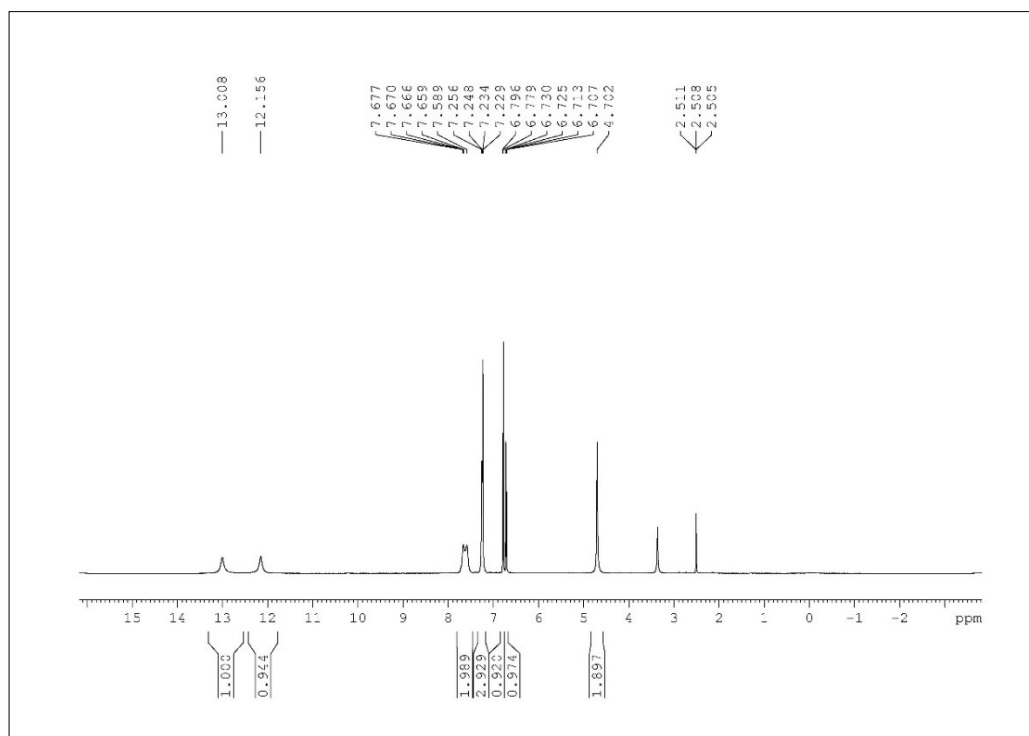

Figure S8 <sup>1</sup>H NMR of P1

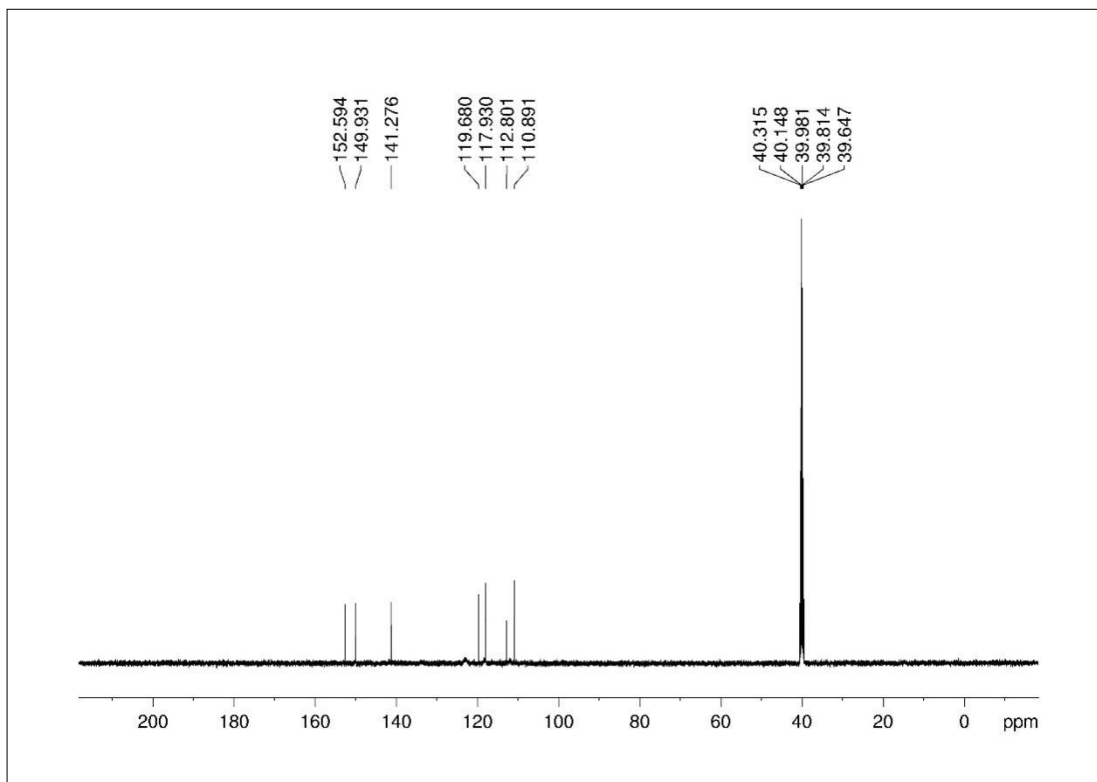

Figure S9 <sup>13</sup>C NMR of P1

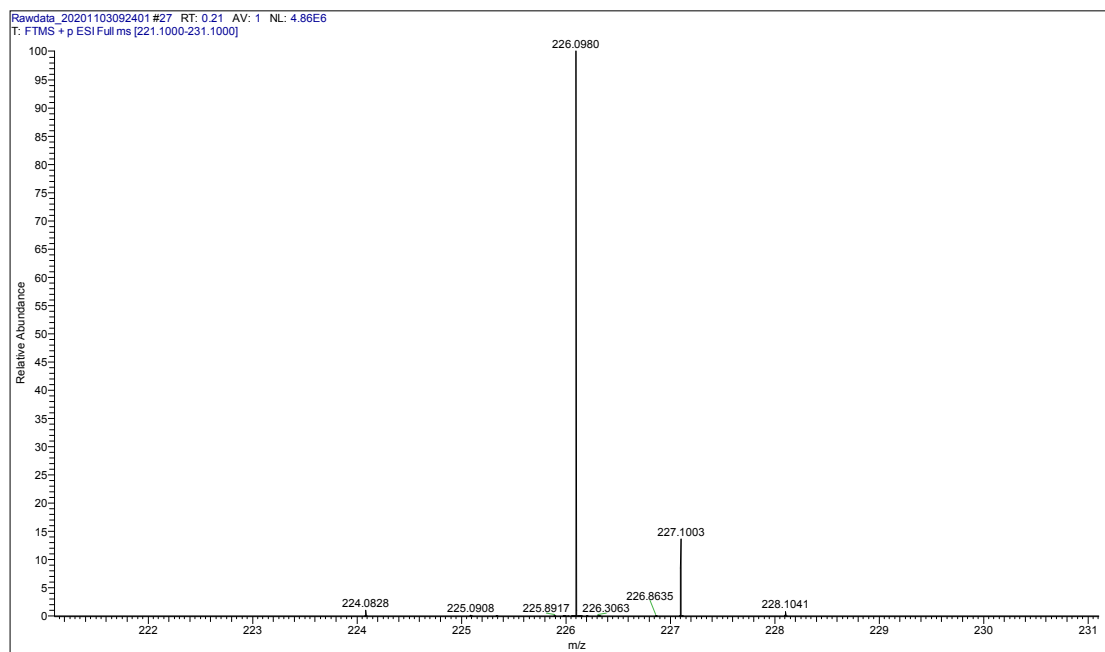

Figure S10 HRMS of P1



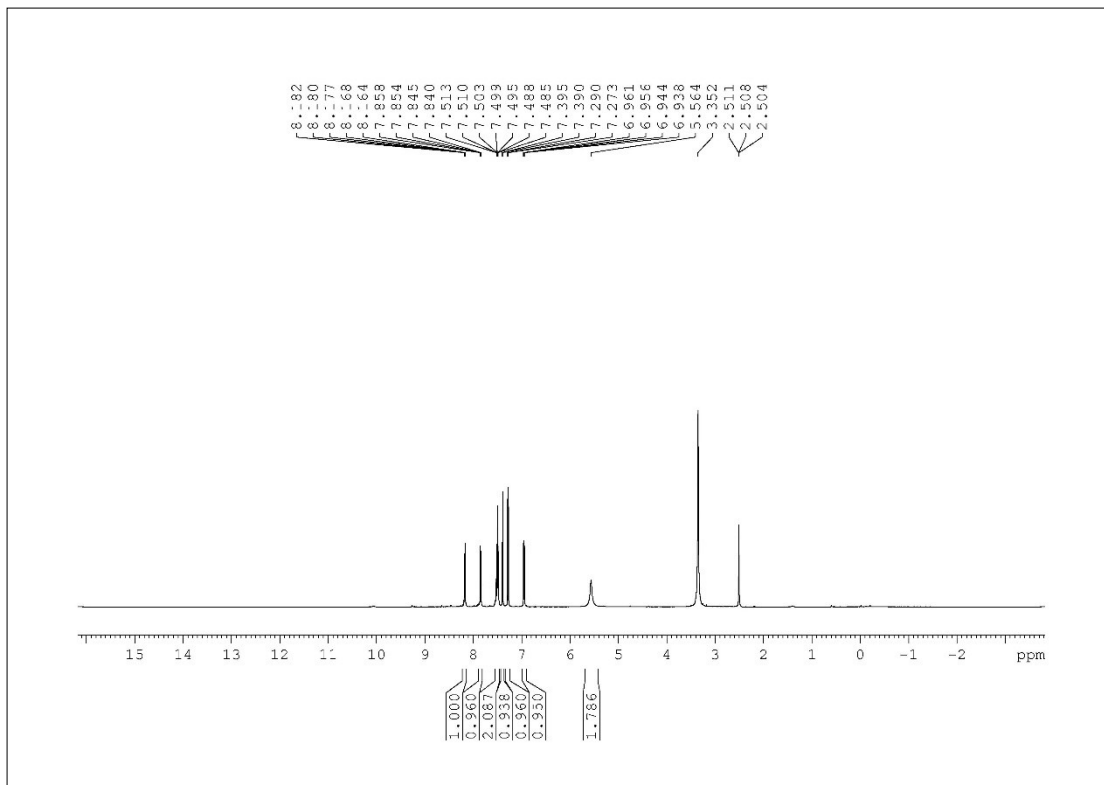

Figure S11  $^1\text{H}$ NMR of P1-CO

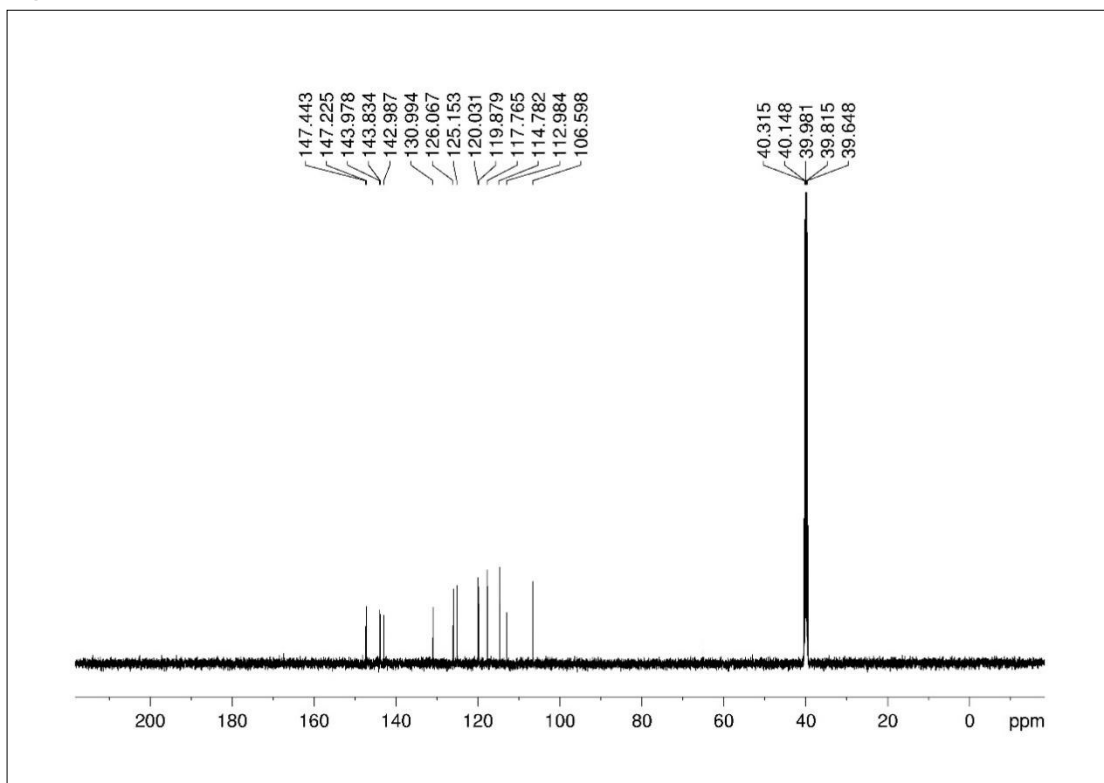

Figure S12  $^{13}\text{C}$  NMR of P1-CO

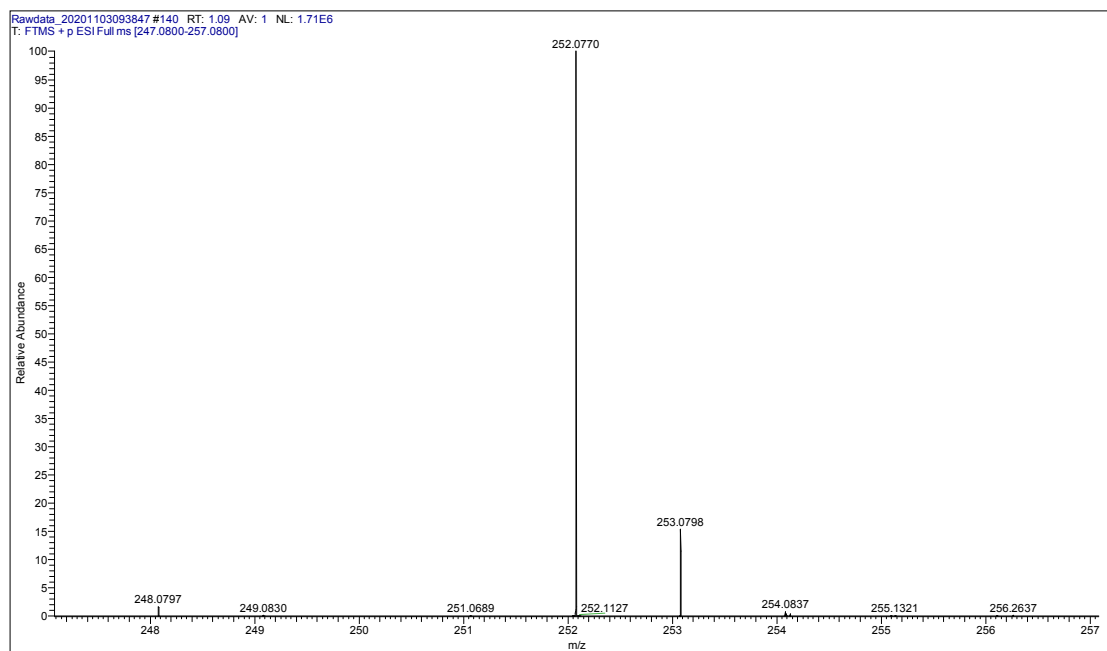

**Figure S13** HRMS of P1-CO

10. Table S2 Comparison of recently reported probes for phosgene detection.

| Structure                                                                           | Mechanism | Detection type | Reaction process                                           | $\lambda_{ex}/\lambda_{em}$ (nm)                   | Detection limit          | Response time | Reference                                                     |
|-------------------------------------------------------------------------------------|-----------|----------------|------------------------------------------------------------|----------------------------------------------------|--------------------------|---------------|---------------------------------------------------------------|
| 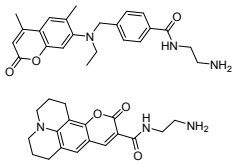   | FRET      | Ratiometric    | intermolecular reaction of two fluorophores                | $\lambda_{ex} = 343$ nm<br>$\lambda_{em} = 464$ nm | 50 $\mu$ M               | --            | <i>Chem. Commun.</i> , 2007, <b>12</b> , 1238.                |
|    | --        | Turn-on        | ring opening reaction of benzimidazole-fused rhodamine dye | $\lambda_{ex} = 560$ nm<br>$\lambda_{em} = 590$ nm | 50 nM<br>(Triphosgene)   | 20-30 s       | <i>Chem Commun.</i> , 2012, <b>48</b> , 1895.                 |
|    | --        | Turn-on        | intramolecular reaction of cinnamic acids                  | $\lambda_{ex} = 330$ nm<br>$\lambda_{em} = 382$ nm | 1 nM                     | --            | <i>Anal. Chem.</i> , 2012, <b>84</b> , 4594                   |
|   | PET       | Turn-on        | twice carbamylation reactions                              | $\lambda_{ex} = 270$ nm<br>$\lambda_{em} = 308$ nm | 0.7 ppb<br>(Triphosgene) | 2 min         | <i>ACS Appl. Mater. Interfaces.</i> , 2016, <b>8</b> , 22246. |
|  | PET       | Turn-on        | twice carbamylation reactions                              | $\lambda_{ex} = 580$ nm<br>$\lambda_{em} = 593$ nm | 20 nM<br>(Triphosgene)   | 2 min         | <i>Angew. Chem. Int. Edit.</i> , 2016, <b>55</b> , 4729.      |

|                                                                                     |     |             |                                 |                                                                                          |                           |         |                                                              |
|-------------------------------------------------------------------------------------|-----|-------------|---------------------------------|------------------------------------------------------------------------------------------|---------------------------|---------|--------------------------------------------------------------|
| 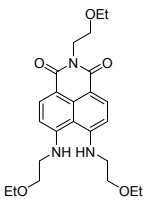   | ICT | Ratiometric | twice carbamylation reactions   | $\lambda_{\text{ex}} = 410 \text{ nm}$<br>$\lambda_{\text{em}} = 511/442 \text{ nm}$     | 1.3 nM<br>(Triphosgene)   | 20 min  | <i>Chem. Commun.</i> , 2017, <b>53</b> , 1530.               |
|    | PET | Turn-on     | twice carbamylation reactions   | $\lambda_{\text{ex}} = 368 \text{ nm}$<br>$\lambda_{\text{em}} = 446 \text{ nm}$         | 3 nM<br>(Triphosgene)     | 0.5 min | <i>ACS Sens.</i> , 2017, <b>2</b> , 178.                     |
|    | ICT | Ratiometric | twice carbamylation reactions   | $\lambda_{\text{ex}} = 390/465 \text{ nm}$<br>$\lambda_{\text{em}} = 445/512 \text{ nm}$ | 0.12 nM<br>(Phosgene)     | 1.5 s   | <i>ACS Appl. Mater. Interfaces</i> , 2017, <b>9</b> , 13920. |
|   | --  | Turn-on     | Dehydration of oxime to nitrile | $\lambda_{\text{ex}} = 530 \text{ nm}$<br>$\lambda_{\text{em}} = 570 \text{ nm}$         | 0.09 ppb<br>(Triphosgene) | 10 s    | <i>Anal. Chem.</i> , 2017, <b>89</b> , 12837.                |
|  | PET | Turn-on     | twice carbamylation reactions   | $\lambda_{\text{ex}} = 450 \text{ nm}$<br>$\lambda_{\text{em}} = 530 \text{ nm}$         | 2.7 nM<br>(Triphosgene)   | 15 s    | <i>Anal. Chem.</i> , 2017, <b>89</b> , 4192.                 |

|                                                                                     |       |             |                                |                                                                                      |                         |        |                                                     |
|-------------------------------------------------------------------------------------|-------|-------------|--------------------------------|--------------------------------------------------------------------------------------|-------------------------|--------|-----------------------------------------------------|
| 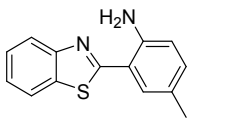   | ESIPT | Ratiometric | twice carbamylation reactions  | $\lambda_{\text{ex}} = 375 \text{ nm}$<br>$\lambda_{\text{em}} = 445/495 \text{ nm}$ | 0.14 ppm<br>(Phosgene)  | 5 min  | <i>Anal. Chem.</i> , 2017, <b>89</b> , 12596.       |
|    | ICT   | Turn-on     | twice carbamylation reactions  | $\lambda_{\text{ex}} = 380 \text{ nm}$<br>$\lambda_{\text{em}} = 508 \text{ nm}$     | 20 nM<br>(Phosgene)     | 20 min | <i>Org. Chem. Front.</i> , 2017, <b>4</b> , 1719.   |
|    | ICT   | Ratiometric | twice carbamylation reactions  | $\lambda_{\text{ex}} = 440 \text{ nm}$<br>$\lambda_{\text{em}} = 482/550 \text{ nm}$ | 27 nM<br>(Phosgene)     | 2 min  | <i>Anal. Chim. Acta.</i> , 2018, <b>1029</b> , 97.  |
|    | ICT   | Turn-on     | twice carbamylation reactions  | $\lambda_{\text{ex}} = 400 \text{ nm}$<br>$\lambda_{\text{em}} = 468 \text{ nm}$     | 0.2 nM<br>(Triphosgene) | 30 s   | <i>Chem. Eur. J.</i> , 2018, <b>24</b> , 5652.      |
|   | --    | Turn-on     | conversion of amide to nitrile | $\lambda_{\text{ex}} = 653 \text{ nm}$<br>$\lambda_{\text{em}} = 679 \text{ nm}$     | 8.9 nM<br>(Triphosgene) | 4 min  | <i>J. Mater. Chem. C.</i> , 2018, <b>6</b> , 10472. |
|  | PET   | Turn-on     | twice carbamylation reactions  | $\lambda_{\text{ex}} = 460 \text{ nm}$<br>$\lambda_{\text{em}} = 511 \text{ nm}$     | 179 nM<br>(Triphosgene) | 10 s   | <i>Chem. Eur. J.</i> , 2018, <b>24</b> , 3136.      |

|                                                                                     |       |             |                                  |                                                                            |                          |                |                                                         |
|-------------------------------------------------------------------------------------|-------|-------------|----------------------------------|----------------------------------------------------------------------------|--------------------------|----------------|---------------------------------------------------------|
| 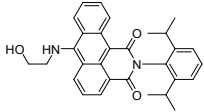   | ICT   | Ratiometric | twice carbamylation reactions    | $\lambda_{ex} = 434/502 \text{ nm}$<br>$\lambda_{em} = 482/615 \text{ nm}$ | 2.3 nM<br>(Phosgene)     | 5 min          | <i>Anal. Chem.</i> , 2018, <b>90</b> , 8686.            |
|    | --    | Turn-on     | Spirocyclic ring -open reaction  | $\lambda_{ex} = 530 \text{ nm}$<br>$\lambda_{em} = 578 \text{ nm}$         | 3.2 ppb<br>(Triphosgene) | 2 min          | <i>Anal. Chem.</i> , 2018, <b>90</b> , 3382.            |
|    | PET   | Turn-on     | twice carbamylation reactions    | $\lambda_{ex} = 480 \text{ nm}$<br>$\lambda_{em} = 516 \text{ nm}$         | 24 pM<br>(Phosgene)      | within<br>3 s  | <i>Sens. Actuator B-Chem.</i> , 2019, <b>283</b> , 458. |
|    | ESIPT | Turn-on     | conversion of oxime to nitrile   | $\lambda_{ex} = 438 \text{ nm}$<br>$\lambda_{em} = 474 \text{ nm}$         | 0.48 nM<br>(Phosgene)    | 20 min         | <i>Dyes Pigment.</i> , 2019, <b>163</b> , 483.          |
|   | ESIPT | Ratiometric | conversion of oxime to isoxazole | $\lambda_{ex} = 382 \text{ nm}$<br>$\lambda_{em} = 495/577 \text{ nm}$     | 0.087 ppm<br>(Phosgene)  | 1.43 s         | <i>J. Mater. Chem. A.</i> , 2019, <b>7</b> , 1756.      |
|  | ICT   | Ratiometric | twice carbamylation reactions    | $\lambda_{ex} = 470 \text{ nm}$<br>$\lambda_{em} = 520/610 \text{ nm}$     | 0.09 nM<br>(Phosgene)    | Within<br>20 s | <i>Dyes Pigment.</i> , 2019, <b>163</b> , 489.          |

|                                                                                     |       |             |                               |                                                                                      |                                    |                |                                                    |
|-------------------------------------------------------------------------------------|-------|-------------|-------------------------------|--------------------------------------------------------------------------------------|------------------------------------|----------------|----------------------------------------------------|
| 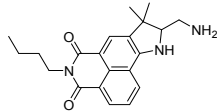   | ICT   | Ratiometric | twice carbamylation reactions | $\lambda_{\text{ex}} = 400 \text{ nm}$<br>$\lambda_{\text{em}} = 488/548 \text{ nm}$ | 0.3 nM<br>(Phosgene)               | 60 s           | <i>J. Mater. Chem. C.</i> , 2019, <b>7</b> , 1510. |
|    | ESIPT | Ratiometric | twice carbamylation reactions | $\lambda_{\text{ex}} = 335 \text{ nm}$<br>$\lambda_{\text{em}} = 393/469 \text{ nm}$ | 0.14 ppm<br>(Phosgene)             | 30 s           | <i>Talanta</i> , 2019, <b>200</b> , 78.            |
|    | ICT   | Turn-on     | twice carbamylation reactions | $\lambda_{\text{ex}} = 390 \text{ nm}$<br>$\lambda_{\text{em}} = 422/526 \text{ nm}$ | 3.2 nM<br>(Phosgene)               | within<br>10 s | <i>Anal Chem.</i> , 2019, <b>91</b> , 5690.        |
|    | PET   | Turn-on     | twice carbamylation reactions | $\lambda_{\text{ex}} = 460 \text{ nm}$<br>$\lambda_{\text{em}} = 525 \text{ nm}$     | 1.2 nM<br>(Triphosgene)            | within<br>20 s | <i>Anal. Methods</i> , 2019, <b>11</b> , 4600.     |
|   | PET   | Turn-on     | twice carbamylation reactions | $\lambda_{\text{ex}} = 350 \text{ nm}$<br>$\lambda_{\text{em}} = 430 \text{ nm}$     | 0.4 $\mu\text{M}$<br>(Triphosgene) | 20 s           | <i>New J. Chem.</i> , 2019, <b>43</b> , 11743.     |
|  | PET   | Turn-on     | twice carbamylation reactions | $\lambda_{\text{ex}} = 440 \text{ nm}$<br>$\lambda_{\text{em}} = 500 \text{ nm}$     | 72 nM<br>(Phosgene)                | 2 min          | <i>Anal Chem.</i> , 2019, <b>91</b> , 12070.       |

|                                                                                     |     |             |                                      |                                                                                          |                       |                |                                                      |
|-------------------------------------------------------------------------------------|-----|-------------|--------------------------------------|------------------------------------------------------------------------------------------|-----------------------|----------------|------------------------------------------------------|
| 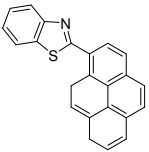   | PET | Ratiometric | chloroformylation reaction of N atom | $\lambda_{\text{ex}} = 400 \text{ nm}$<br>$\lambda_{\text{em}} = 422/445/477 \text{ nm}$ | 1.54 nM<br>(Phosgene) | within<br>50 s | <i>New J. Chem.</i> , 2019,<br><b>43</b> , 14991.    |
|    | --  | Turn-on     | Conversion of amide to nitrile       | $\lambda_{\text{ex}} = 342 \text{ nm}$<br>$\lambda_{\text{em}} = 440 \text{ nm}$         | 5.56 nM<br>(Phosgene) | 1.4 min        | <i>ChemistrySelect</i> , 2019,<br><b>4</b> , 2968.   |
|    | PET | Turn-on     | twice carbamylation reactions        | $\lambda_{\text{ex}} = 432 \text{ nm}$<br>$\lambda_{\text{em}} = 484 \text{ nm}$         | 4.6 nM<br>(Phosgene)  | 15 s           | <i>Chem. Commun.</i> ,<br>2019, <b>55</b> , 13753.   |
|    | PET | Turn-on     | twice carbamylation reactions        | $\lambda_{\text{ex}} = 467 \text{ nm}$<br>$\lambda_{\text{em}} = 530 \text{ nm}$         | 0.15 nM<br>(Phosgene) | 1.5 s          | <i>Org. Lett.</i> , 2019, <b>21</b> ,<br>9497.       |
|   | ICT | Turn-on     | Beckmann rearrangement of ketoxime   | $\lambda_{\text{ex}} = 367 \text{ nm}$<br>$\lambda_{\text{em}} = 448 \text{ nm}$         | 6.3 nM<br>(Phosgene)  | 15 min         | <i>Dyes Pigment.</i> , 2020,<br><b>173</b> , 107854. |
|  | --  | Turn-on     | twice carbamylation reactions        | $\lambda_{\text{ex}} = 440 \text{ nm}$<br>$\lambda_{\text{em}} = 492 \text{ nm}$         | 84.2 nM<br>(Phosgene) | 2 min          | <i>Dyes Pigment.</i> , 2020,<br><b>173</b> , 107933. |



|                                                                                                           |       |             |                               |                                                                                          |                        |             |                                                            |
|-----------------------------------------------------------------------------------------------------------|-------|-------------|-------------------------------|------------------------------------------------------------------------------------------|------------------------|-------------|------------------------------------------------------------|
| 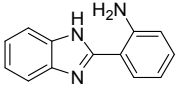                         | --    | Ratiometric | twice carbamylation reactions | $\lambda_{\text{ex}} = 370 \text{ nm}$<br>$\lambda_{\text{em}} = 416 \text{ nm}$         | 1.27 nM<br>(Phosgene)  | 1 min       | <i>Talanta</i> , 2021, <b>221</b> , 121477.                |
|                          | ICT   | Turn-on     | twice carbamylation reactions | $\lambda_{\text{ex}} = 390 \text{ nm}$<br>$\lambda_{\text{em}} = 442/483/517 \text{ nm}$ | 1.65 nM<br>(Phosgene)  | 3 min       | <i>Sens. Actuator B-Chem.</i> , 2021, <b>326</b> , 128837. |
|  <p><b>This work</b></p> | ESIPT | Ratiometric | twice carbamylation reactions | $\lambda_{\text{ex}} = 305 \text{ nm}$<br>$\lambda_{\text{em}} = 358/540 \text{ nm}$     | 5.3 nM<br>(Trihosgene) | Within 50 s |                                                            |
